# Supplementary material
Source: publisher site journal article supplement (https://static.cambridge.org/content/id/urn:cambridge.org:id:article:S1935789320000129/resource/name/S1935789320000129supp002.docx)
Supplement: Supplementary file 1 [file S1935789320000129supp002.docx]

27th December 2019

Dear editor and reviewers,

Thank you very much for the positive evaluation of our manuscript and useful suggestions. We have made specific revisions in the manuscript based on your suggestions.

Sincerely,

Bipin Adhikari

Reviewer: 1

Comments to the Author
**A good manuscript.
Correctly analyzes the distribution of mortality in Nepal Earthquake showing differentials by sex, age and jurisdictions. The methods used are correct.**

AUTHORS: Thank you for your comments.

**Please, avoid the expression "natural disasters", there is enough evidence to consider that disasters are not natural.**

AUTHORS: Thank you for the suggestion. Revised as suggested.

**The " future recommendations" noted in the title are not entirely clear in the text. I suggest to include a subtitle specifically dedicated to deepening recommendations for health authorities.**

AUTHORS: Thank you for the suggestion. We have added a specific sub-heading ‘Future recommendations’ and the paragraphs under it in revised version.
